# Supplementary material
Source: PubMed Central journal article supplement (PMC4251619)
Supplement: chest_146_6_1594_ds01.pdf [file chest_146_6_1594_ds01.pdf]

## End-of-Life Expenditure in the ICU and Perceived Quality of Dying

Nita Khandelwal, MD; Ruth A. Engelberg, PhD; David C. Benkeser, MPH;  
Norma B. Coe, PhD; and J. Randall Curtis, MD, MPH

CHEST 2014; 146(6):1594-1603

**e-Table 1.** Family-assessed outcomes stratified by insurance type<sup>a</sup>

|                                       | FS-ICU (n=302) |                  |         | QODD-1 (n=292) |                  |         |
|---------------------------------------|----------------|------------------|---------|----------------|------------------|---------|
|                                       | n              | $\beta$ (95% CI) | P-value | n              | $\beta$ (95% CI) | P-value |
| Average ICU Cost per day <sup>b</sup> |                |                  |         |                |                  |         |
| Private                               | 64             | -2.2 (-9.0,4.5)  | 0.52    | 64             | 0.0 (-0.7,0.7)   | 0.91    |
| Medicare                              | 172            | -0.7 (-3.8,2.4)  | 0.64    | 164            | -0.0 (-0.8,0.7)  | 0.92    |
| Medicaid                              | 40             | 14.0 (6.0,22.0)  | <0.01   | 40             | 2.4 (0.7,4.0)    | <0.01   |
| None/Unknown                          | 26             | 7.6 (1.1,14.1)   | 0.02    | 24             | 1.0 (-0.0,1.9)   | 0.05    |

FS-ICU = Family satisfaction in the ICU Unit Survey; QODD-1 = Single item quality of dying rating from the Quality of Dying and Death questionnaire

<sup>a</sup> All are fully interacted models that included level and interaction terms for intervention (pre/post), hospital, patient age and patient insurance status (underinsured versus private/Medicare).

<sup>b</sup> Cost variable of interest has been log transformed and adjusted for inflation and so that all costs were compared at the 2013 U.S. Dollar value.

*Online supplements are not copyedited prior to posting.*

**e-Table 2.** Family-assessed outcomes excluding patients who died on day of admission<sup>a</sup>

|                                       | FS-ICU (n=302) |                 |         | QODD-1 (n=292) |                 |         |
|---------------------------------------|----------------|-----------------|---------|----------------|-----------------|---------|
|                                       | n              | β (95% CI)      | P-value | n              | β (95% CI)      | P-value |
| Average ICU Cost per day <sup>b</sup> |                |                 |         |                |                 |         |
| Private/Medicare                      | 165            | 2.0 (-4.0,8.0)  | 0.51    | 160            | -0.1 (-1.3,1.1) | 0.87    |
| Underinsured                          | 49             | 12.5 (6.3,18.7) | <0.01   | 48             | 1.6 (-0.0,3.2)  | 0.05    |

FS-ICU = Family satisfaction in the ICU Unit Survey; QODD-1 = Single item quality of dying rating from the Quality of Dying and Death questionnaire

<sup>a</sup> All are fully interacted models that included level and interaction terms for intervention (pre/post), hospital, patient age and patient insurance status (underinsured versus private/Medicare).

<sup>b</sup> Cost variable of interest has been log transformed and adjusted for inflation and so that all costs were compared at the 2013 U.S. Dollar value.

*Online supplements are not copyedited prior to posting.*

**e-Table 3.** Family-assessed outcomes stratified by ICU LOS

| FS-ICU (n=302)                        |     |                  |         | QODD-1 (n=292) |                  |         |
|---------------------------------------|-----|------------------|---------|----------------|------------------|---------|
| ICU LOS $\leq$ 2 days                 | n   | $\beta$ (95% CI) | P-value | n              | $\beta$ (95% CI) | P-value |
| Average ICU Cost per day <sup>b</sup> |     |                  |         |                |                  |         |
| Private/Medicare                      | 103 | -1.8 (-4.9,1.3)  | 0.25    | 100            | -0.1 (-0.7,0.5)  | 0.77    |
| Underinsured                          | 22  | 5.4 (0.3,10.5)   | 0.04    | 21             | 1.8 (0.4,3.1)    | 0.01    |
| Total ICU Cost <sup>b</sup>           |     |                  |         |                |                  |         |
| Private/Medicare                      | 103 | -1.3 (-4.1,1.5)  | 0.35    | 100            | -0.1 (-0.7,0.5)  | 0.84    |
| Underinsured                          | 22  | 5.1 (-0.4,10.6)  | 0.07    | 21             | 1.7 (0.2,3.2)    | 0.03    |
| ICU LOS > 2 days                      |     |                  |         |                |                  |         |
| Average ICU Cost per day <sup>b</sup> |     |                  |         |                |                  |         |
| Private/Medicare                      | 133 | 4.2 (-3.8,12.2)  | 0.3     | 128            | 0.1 (-1.3,1.5)   | 0.89    |
| Underinsured                          | 44  | 13.8 (7.2,20.5)  | <.01    | 43             | 1.6 (-0.1,3.2)   | 0.07    |
| Total ICU Cost <sup>b</sup>           |     |                  |         |                |                  |         |
| Private/Medicare                      | 133 | -0.2 (-2.3,1.9)  | 0.86    | 128            | -0.1 (-0.5,0.3)  | 0.72    |
| Underinsured                          | 44  | -1.6 (-8.1,4.9)  | 0.63    | 43             | -0.8 (-1.7,0.2)  | 0.11    |

FS-ICU = Family satisfaction in the ICU Unit Survey; QODD-1 = Single item quality of dying rating from the Quality of Dying and Death questionnaire

<sup>a</sup> All are fully interacted models that included level and interaction terms for intervention (pre/post), hospital, patient age and patient insurance status (underinsured versus private/Medicare).

<sup>b</sup> Cost variable of interest has been log transformed and adjusted for inflation and so that all costs were compared at the 2013 U.S. Dollar value

*Online supplements are not copyedited prior to posting.*
